# Supplementary material
Source: publisher site journal article supplement (https://www.spandidos-publications.com/2357/downloadSupplementary)
Supplement: Supplementary file 1 [file downloadSupplementary]

## Sheet: Table SI
Table SI. Time point of plasma collection for 25 patients with ESCC. The numbers in the table represent the time from the baseline (days). The presence of the number represents that a sample was collected at the corresponding time point.
Patient ID	Baseline (days)	During radiation (days)	Post-radiation (days)	Follow-up 1 (days)	Follow-up 2 (days)	Follow-up 3 (days)	Follow-up 4 (days)
P01	0	52	99	679
P02	0		78
P03	0		93
P04	0	31	168
P05	0		77
P06	0		121
P07	0		238
P08	0		56	80	115	229	279
P09	0		95
P10	0		91	168	219
P11	0
P12	0		106
P13	0		117
P14	0	45	92	182	272
P15	0		98
P16	0		310	453
P17	0		96	195
P18	0		31
P19	0		92
P20	0		175	406
P21	0		125	180
P22	0	43	113
P23	0		174
P24	0		51
P25	0	43	79	166	261
